# Supplementary material for: Temporal Profiling of Gene Networks Associated with the Late Phase of Long-Term Potentiation In Vivo
Source: PLoS One. 2012 Jul 10;7(7):e40538. doi: 10.1371/journal.pone.0040538 (PMC3393663; doi:10.1371/journal.pone.0040538)
Supplement: Table S8 — Targets of miR-24-1 predicted by TargetScan, miRanda and PicTar. (XLSX) [file pone.0040538.s013.xlsx]

## Sheet: Sheet
Supplementary Table 8: Targets of miR-24-1 predicted by TargetScan, miRanda and PicTar
Gene Symbol	Gene Title	Protein Function
Bcl2l2	B-cell CLL/lymphoma 2-like 2	Promotes cell survival
Per1	Period homolog 1 (Drosophila)	Negative element in the circadian transcriptional loop
Rap1a	RAP1A, member of RAS oncogene family	Counteracts the mitogenic function of Ras proteins
Lppr2	Lipid phosphate phosphatase-related protein type 2	Plasticity-related gene
Wdr23	WD40 repeat protein 23	Coordinates multi-protein complex assemblies
Kpna3	Karyopherin alpha 3 (importin alpha 4)	Nuclear protein import
Gal3st3	Galactose-3-O-sulfotransferase 3	Catalyses sulfonation
Rnf2	Ring finger protein 2	Transcriptional repression of various genes involved in development and cell proliferation
Snn	Stannin	Plays a role in the toxic effects of organotins
Syp	Synaptophysin	Integral membrane protein of small synaptic vesicles; regulation of plasticity
Ogt	O-linked N-acetylglucosamine (GlcNAc) transferase	Catalyses the addition of a single N-acetylglucosamine in O-glycosidic linkage to serine or threonine residues.
Matr3	Matrin 3	Nuclear matrix protein
Ptprf	Protein tyrosine phosphatase, receptor type, F	Signaling molecules that regulate a variety of cellular processes including cell growth, differentiation, mitotic cycle, and oncogenic transformation.
Furin	Furin (paired basic amino acid cleaving enzyme)	Proprotein convertase
Insig1	Insulin induced gene 1	Regulates cholesterol homeostasis
Per2	Period homolog 2 (Drosophila)	Negative element in the circadian transcriptional loop.
Rap1b	RAP1B, member of RAS oncogene family	Cell signaling
Dlgap4	Discs, large (Drosophila) homolog-associated protein 4	Membrane-associated guanylate kinase found at the postsynaptic density in neuronal cells; interacts with potassium channels and receptors, as well as other signaling molecules.
Cct3	Chaperonin containing TCP1, subunit 3 (gamma)	Assists the folding of proteins upon ATP hydrolysis
